# Supplementary material for: Paracrine signalling between intestinal epithelial and tumour cells induces a regenerative programme
Source: eLife. 2022 May 11;11:e76541. doi: 10.7554/eLife.76541 (PMC9094746; doi:10.7554/eLife.76541)
Supplement: Figure 1—figure supplement 1—source data 1. [file elife-76541-fig1-figsupp1-data1.xlsx]

## Sheet: FigS1B
WT	Tumoroids A	Tumoroids B	Tumoroids C	Tumoroids D	Tumoroids E
0	2.44	3.7	6.25	10.64	2.86
1.33	3.61		9.72	23.81
					14.04
0.9	17.43	9.09	18.58	17.95	38.05
				28.03
2.42				10.14
