# Supplementary material for: Paracrine signalling between intestinal epithelial and tumour cells induces a regenerative programme
Source: eLife. 2022 May 11;11:e76541. doi: 10.7554/eLife.76541 (PMC9094746; doi:10.7554/eLife.76541)
Supplement: Figure 1—figure supplement 1—source data 2. [file elife-76541-fig1-figsupp1-data2.xlsx]

## Sheet: FigS1C
WT-cM	T-cM	Apc f/f 1	Apc f/f 2	Apc f/f 3
0	10.56	16.22	14.14	15.22
0	11.97	15.71	21.05	12.02
0	13.51	22.82	20.48	11.32
