# Supplementary material for: Paracrine signalling between intestinal epithelial and tumour cells induces a regenerative programme
Source: eLife. 2022 May 11;11:e76541. doi: 10.7554/eLife.76541 (PMC9094746; doi:10.7554/eLife.76541)
Supplement: Figure 1—figure supplement 1—source data 3. [file elife-76541-fig1-figsupp1-data3.xlsx]

## Sheet: FigS1F
ENR	ENRC	WT-cM	T-cM
2.37	5.82	2.66	2.05
1.49	6.97	1.54	1.61
3.28	7.52	3.54	6.81
4.66	6.31	5.02	4.54
