# Supplementary material for: Paracrine signalling between intestinal epithelial and tumour cells induces a regenerative programme
Source: eLife. 2022 May 11;11:e76541. doi: 10.7554/eLife.76541 (PMC9094746; doi:10.7554/eLife.76541)
Supplement: Figure 1—figure supplement 1—source data 4. [file elife-76541-fig1-figsupp1-data4.xlsx]

## Sheet: FigS1G
WT-cM	T-cM x B	TcM x C
58.1016	63.2678	90.9319
89.3844	71.3415	91.3813
84.1243	59.6087	96.5089
55.7341	66.1368	91.3802
59.735	76.4527	89.7375
75.9834	72.4677	91.3636
41.9866	53.5507	75.2907
54.8045	69.2522	79.1903
66.4042	40.1291	93.9223
49.8344	75.0206
53.4539	65.485
64.5425	81.9801
39.9327	47.3526
46.7967	59.663
75.3998	85.8023
71.1765
