# Supplementary material for: Paracrine signalling between intestinal epithelial and tumour cells induces a regenerative programme
Source: eLife. 2022 May 11;11:e76541. doi: 10.7554/eLife.76541 (PMC9094746; doi:10.7554/eLife.76541)
Supplement: Figure 1—source data 1. [file elife-76541-fig1-data1.xlsx]

## Sheet: Fig1G
WT-cM x B	T-cM x B	T-cM x C
21.7737	25.1381	81.071
49.5039	50.9209	51.5909
49.0343	26.376	56.3342
70.6952	25.1117	72.963
40.7443	39.1881	75.121
51.4658	58.6753	45.6204
44.0907	41.3825	71.2526
27.0089	55.5429	61.1898
31.0966	55.4674	37.1681
22.7113	28.7764	55.5556
40.2865	30.575	87.0416
40.8895	45.013
25.976	34.7328
35.1379
