# Supplementary material for: Paracrine signalling between intestinal epithelial and tumour cells induces a regenerative programme
Source: eLife. 2022 May 11;11:e76541. doi: 10.7554/eLife.76541 (PMC9094746; doi:10.7554/eLife.76541)
Supplement: Figure 2—source data 1. [file elife-76541-fig2-data1.xlsx]

## Sheet: Fig2A
IgG1	Cp	CTGF	HDGF	Lgals3	Lgals3bp	Thbs1	Ttr
21.33	18.75	21.43	16.8	18.55	18.68	0	20.69
17.24						0
23.91	23.61	23.16				0
12.96	6.25	9.52	3.01	6.98	10	0	9.38
13.25	6.63	4.82	1.81	7.23	8.43	0.6	10.24
