# Supplementary material for: Paracrine signalling between intestinal epithelial and tumour cells induces a regenerative programme
Source: eLife. 2022 May 11;11:e76541. doi: 10.7554/eLife.76541 (PMC9094746; doi:10.7554/eLife.76541)
Supplement: Figure 2—source data 2. [file elife-76541-fig2-data2.xlsx]

## Sheet: Fig2B
IgG1	A4.1	A6.1	C6.7
14.7	0	0	0
12.96	0	0	0
24.14	0	0	0
