# Supplementary material for: Paracrine signalling between intestinal epithelial and tumour cells induces a regenerative programme
Source: eLife. 2022 May 11;11:e76541. doi: 10.7554/eLife.76541 (PMC9094746; doi:10.7554/eLife.76541)
Supplement: Figure 2—source data 3. [file elife-76541-fig2-data3.xlsx]

## Sheet: Fig2C
IgG1 x B	IgG1 x C	anti-Thbs1 x B
30.4256	45.4397	43.921
27.4634	35.101	14.5399
34.6317	53.5822	31.3525
27.8746	64.6933	8.2116
38.3608		39.4155
36.4236		29.4521
41.2446		9.7942
44.9067		26.2303
20.3525		35.8528
