# Supplementary material for: Paracrine signalling between intestinal epithelial and tumour cells induces a regenerative programme
Source: eLife. 2022 May 11;11:e76541. doi: 10.7554/eLife.76541 (PMC9094746; doi:10.7554/eLife.76541)
Supplement: Figure 2—source data 4. [file elife-76541-fig2-data4.xlsx]

## Sheet: Fig 2I
Lenti Control	Lenti Thbs1
0	13.51
0	9.8
0.88	20.24
4.59	10.59
1.66	18.45
