# Supplementary material for: Paracrine signalling between intestinal epithelial and tumour cells induces a regenerative programme
Source: eLife. 2022 May 11;11:e76541. doi: 10.7554/eLife.76541 (PMC9094746; doi:10.7554/eLife.76541)
Supplement: Figure 3—figure supplement 1—source data 1. [file elife-76541-fig3-figsupp1-data1.xlsx]

## Sheet: FigS3E
CTRL	KO
66.67	20
88.89	0
59.18	70
63.64	7.41
71.43	9.52
61.11	9.09
70	25
73.53	16.67
77.78	66.67
72.73	12.5
77.78	14.29
48	7.69
60.87	36.84
75	16
	0
	0
	20.69
	11.11
	50
	20
	0
