# Supplementary material for: Paracrine signalling between intestinal epithelial and tumour cells induces a regenerative programme
Source: eLife. 2022 May 11;11:e76541. doi: 10.7554/eLife.76541 (PMC9094746; doi:10.7554/eLife.76541)
Supplement: Figure 3—source data 2. [file elife-76541-fig3-data2.xlsx]

## Sheet: Fig3H
IgG1	anti-Thbs1
267	87
241	28
403	46
