# Supplementary material for: Paracrine signalling between intestinal epithelial and tumour cells induces a regenerative programme
Source: eLife. 2022 May 11;11:e76541. doi: 10.7554/eLife.76541 (PMC9094746; doi:10.7554/eLife.76541)
Supplement: Figure 3—source data 3. [file elife-76541-fig3-data3.xlsx]

## Sheet: Fig3I
IgG	A6.1	A4.1	C6.7
60.36	24.78	24.02	36.59
67.41	18.97	17.2	21.1
96	36.11	4.69	14.29
79.09		4.55	10.42
