# Supplementary material for: Paracrine signalling between intestinal epithelial and tumour cells induces a regenerative programme
Source: eLife. 2022 May 11;11:e76541. doi: 10.7554/eLife.76541 (PMC9094746; doi:10.7554/eLife.76541)
Supplement: Figure 3—source data 4. [file elife-76541-fig3-data4.xlsx]

## Sheet: Fig3J
IgG	A6.1	A4.1	C6.7
338	230	204	246
135	116	93	109
125	72	64	77
110		44	48
