# Supplementary material for: Paracrine signalling between intestinal epithelial and tumour cells induces a regenerative programme
Source: eLife. 2022 May 11;11:e76541. doi: 10.7554/eLife.76541 (PMC9094746; doi:10.7554/eLife.76541)
Supplement: Figure 3—source data 5. [file elife-76541-fig3-data5.xlsx]

## Sheet: Fig3O
IgG1	anti-Thbs1
19.8686	18.112
17.0719	29.814
23.803	18.8303
16.8963	15.2518
	9.6935
	22.5066
