# Supplementary material for: Paracrine signalling between intestinal epithelial and tumour cells induces a regenerative programme
Source: eLife. 2022 May 11;11:e76541. doi: 10.7554/eLife.76541 (PMC9094746; doi:10.7554/eLife.76541)
Supplement: Figure 3—source data 6. [file elife-76541-fig3-data6.xlsx]

## Sheet: Fig3P
IgG1	anti-Thbs1
74.8403	57.0064
12.8205	10.0906
62.5	51.7544
77.6119	45.1146
64.6392	11.0966
85.4452	26.1905
57.2059	21.0475
39.5925	44.4068
5.5276	22.3164
38.9605	13.1579
12.0235	26.9555
12.1457	0
54.8689	17.8987
51.5924	41.6537
	18.3502
	9.3596
	30.4498
	1.8405
	9.1825
	4.8128
	32.7788
	46.4817
	28.2374
	25.1055
	24.6241
	32.6923
	0
	18.6495
	34.56
