# Supplementary material for: Paracrine signalling between intestinal epithelial and tumour cells induces a regenerative programme
Source: eLife. 2022 May 11;11:e76541. doi: 10.7554/eLife.76541 (PMC9094746; doi:10.7554/eLife.76541)
Supplement: Figure 4—figure supplement 1—source data 1. [file elife-76541-fig4-figsupp1-data1.xlsx]

## Sheet: Fig S4I
WT-cM	T-cM
60.95	44.26
12.82	46.06
16.1	24.53
37.27	54.74
34.45	82.87
6.08	39.54
10.11	50.91
4.09	61.29
22.7	76.75
