# Supplementary material for: Paracrine signalling between intestinal epithelial and tumour cells induces a regenerative programme
Source: eLife. 2022 May 11;11:e76541. doi: 10.7554/eLife.76541 (PMC9094746; doi:10.7554/eLife.76541)
Supplement: Figure 4—figure supplement 1—source data 2. [file elife-76541-fig4-figsupp1-data2.xlsx]

## Sheet: FigS4J
WT-cM	T-cM
15.39	14.76
3.52	24.77
38.73	16.9
0.47	6.53
0	22.65
4.94	22.75
20.98	21.48
3.44	30.88
25.37	8.39
	18.81
