# Supplementary material for: Paracrine signalling between intestinal epithelial and tumour cells induces a regenerative programme
Source: eLife. 2022 May 11;11:e76541. doi: 10.7554/eLife.76541 (PMC9094746; doi:10.7554/eLife.76541)
Supplement: Figure 4—source data 1. [file elife-76541-fig4-data1.xlsx]

## Sheet: Fig4H
WT	KO-Yap1	KO-Tead4
0.0967742	0	0.0243902
0.108371	0.0123457	0.0291316
0.147208	0.0491803	0
0.0890392
0.134375
0.112554
