# Supplementary material for: Paracrine signalling between intestinal epithelial and tumour cells induces a regenerative programme
Source: eLife. 2022 May 11;11:e76541. doi: 10.7554/eLife.76541 (PMC9094746; doi:10.7554/eLife.76541)
Supplement: Figure 4—source data 2. [file elife-76541-fig4-data2.xlsx]

## Sheet: Fig4O
WT-cM	T-cM x Budding	T-cM x Cystic	T-cM x anti-Thbs1	Lenti Thbs1	Tumoroids
26.29	21.64	76.58	28.85	71.5488	91.7329
14.41	16.58	68.46	53.04	78.9538	89.4231
31.19	50.34	89.25	9.42	52.0936	86.4516
21.7	29.01	74.05	20.07	54.0598	86.5169
14.76	37.95	95.31	49.88	47.0199	79.0992
33.05	21.14	65.91	16.06	81.2207	80.3867
38.8	52.26	90.63	41.48	63.8436	88.4848
22.57	52.36	100	16.49	84.57	78.5081
	40.56		28.96	36.85	87.7323
	39.84		24.62	11.58	90.6977
	21.59		12.04	85.07	98.1838
	32.63		22.3	45.65	95.0564
	25.41		51.5	58.08	96.6921
	84.4			53.97	97.2558
	43.25			18.51	100
	58.72				97.774
	32.5				93.5305
	28.28				86.133
	58.46				79.0639
	80.65				96.1039
	26.65				97.1698
	61.9				96.4377
	48.35				97.8261
	29.93				98.317
	17.29				90.9091
					93.743
					86.8644
