# Supplementary material for: Paracrine signalling between intestinal epithelial and tumour cells induces a regenerative programme
Source: eLife. 2022 May 11;11:e76541. doi: 10.7554/eLife.76541 (PMC9094746; doi:10.7554/eLife.76541)
Supplement: Figure 4—source data 3. [file elife-76541-fig4-data3.xlsx]

## Sheet: Fig4P
anti-IgG1	anti-Thbs1
59.24	28.85
81.82	53.04
59.8	9.42
	20.07
	49.88
	16.06
	41.48
	16.49
	28.96
	24.62
	12.04
	22.3
	51.5
