# Supplementary material for: Paracrine signalling between intestinal epithelial and tumour cells induces a regenerative programme
Source: eLife. 2022 May 11;11:e76541. doi: 10.7554/eLife.76541 (PMC9094746; doi:10.7554/eLife.76541)
Supplement: Figure 5—figure supplement 1—source data 1. [file elife-76541-fig5-figsupp1-data1.xlsx]

## Sheet: FigS5E
	Silvia			Guillaume
	Mean	SD	N	Mean	SD	N
Thbs1+	17.13	16.85	22	23.99	20.43	22
Lgr5+	41.46	12.59	22	41	20.45	22
Thbs1+Lgr5+	41.41	12.29	22	35.01	12.02	22
