# Supplementary material for: Paracrine signalling between intestinal epithelial and tumour cells induces a regenerative programme
Source: eLife. 2022 May 11;11:e76541. doi: 10.7554/eLife.76541 (PMC9094746; doi:10.7554/eLife.76541)
Supplement: Figure 5—figure supplement 1—source data 2. [file elife-76541-fig5-figsupp1-data2.xlsx]

## Sheet: FigS5J
	Silvia			mathilde			G
	Mean	SD	N	Mean	SD	N	Mean	SD	N
Thbs1+	59.49	39.74	25	61.8	32.44	29	56.69
Sca1+	35.57	39.03	25	34.1	32.49	29	39.92
Thbs1+Lgr5+	4.93	8.05	25	4.1	6.51	29	3.39
