# Supplementary material for: Paracrine signalling between intestinal epithelial and tumour cells induces a regenerative programme
Source: eLife. 2022 May 11;11:e76541. doi: 10.7554/eLife.76541 (PMC9094746; doi:10.7554/eLife.76541)
Supplement: Figure 5—figure supplement 1—source data 3. [file elife-76541-fig5-figsupp1-data3.xlsx]

## Sheet: FigS5M
Thbs1+	Sca1+	Thbs1+Sca1+	random Thbs1+Sca1+
15.31	79.8	4.89	15.56
9.77	85.94	4.28	11.66
1.68	98.32	0	1.65
80.44	19.56	0	15.73
41.62	49.26	9.13	24.88
81.99	13.71	4.31	14.27
41.47	58.2	0.33	24.28
43.41	46.06	10.54	24.99
52.1	45.2	2.7	24.89
32.96	61.84	5.2	22.62
47.33	47.59	5.08	25
39.89	54.08	6.04	24.58
48.5	51.16	0.34	24.98
60.62	37.18	2.2	23.68
36.7	54.75	8.55	24.32
10.06	84.82	5.12	12.2
2.39	97.21	0.4	2.7
10.29	89.71	0	9.23
2.44	97.56	0	2.38
17.66	82.25	0.1	14.59
17.02	80.9	2.08	15.21
32.04	66.53	1.43	22.11
26.24	72.96	0.8	19.63
34.88	64.94	0.18	22.75
5.49	94.51	0	5.19
0.89	99.1	0.01	0.89
