# Supplementary material for: Paracrine signalling between intestinal epithelial and tumour cells induces a regenerative programme
Source: eLife. 2022 May 11;11:e76541. doi: 10.7554/eLife.76541 (PMC9094746; doi:10.7554/eLife.76541)
Supplement: Figure 5—source data 1. [file elife-76541-fig5-data1.xlsx]

## Sheet: Fig5B
Thbs1+	Lgr5+	Thbs1+Lgr5+	random Thbs1+Lgr5+
29.62	32.03	38.35	24.99
6.77	59.51	33.72	21.1
16.02	49.18	34.8	23.54
16.02	35.05	48.93	24.61
20.47	23.58	55.95	24.99
32.09	25.78	42.12	24.94
51.8	19.15	29.05	22.69
46.78	32.87	20.36	24.53
30.78	32.81	36.4	25
30.81	39.46	29.73	24.89
4.08	39.07	56.85	23.75
12.66	50.18	37.16	23.08
15.61	38.26	46.13	24.37
6.6	67.18	26.22	19.23
5.49	45.21	49.3	23.14
6.33	62.49	31.19	20.38
25.48	45.79	28.73	24.32
19.52	45.12	35.36	24.03
18.54	55.31	26.15	22.73
37.54	22.94	39.52	24.61
5.4	41.31	53.3	23.62
13.9	44.77	41.33	23.78
