# Supplementary material for: Paracrine signalling between intestinal epithelial and tumour cells induces a regenerative programme
Source: eLife. 2022 May 11;11:e76541. doi: 10.7554/eLife.76541 (PMC9094746; doi:10.7554/eLife.76541)
Supplement: Figure 5—source data 2. [file elife-76541-fig5-data2.xlsx]

## Sheet: Fig5D
Thbs1+	Sca1+	Thbs1+Sca1+	random Thbs1+Sca1+
98.88	1.12	0	1.11
98.95	1.05	0	1.04
88.57	8.05	3.38	9.57
73.22	26.78	0	19.61
76.23	12.85	10.91	16.11
19.59	80.41	0	15.75
99.46	0.54	0	0.54
24.43	75.56	0	18.47
80.63	15.45	3.92	15.09
96.89	2.1	1.01	2.97
100	0	0	0
100	0	0	0
3.31	96.69	0	3.2
53.17	46.83	0	24.9
99.95	0.05	0	0.05
38.47	48.35	13.18	24.29
52.86	43.49	3.65	24.63
99.38	0.4	0.22	0.61
49.26	50.74	0	24.99
49.11	46.39	4.5	24.98
79.51	20.49	0	16.29
28.28	54.89	16.83	23.58
30.93	68.22	0.84	21.56
61.38	35.6	3.03	23.48
76.95	21.43	1.62	17.34
61.16	31.57	7.27	23.02
51.38	31.08	17.54	24.36
79.39	16.58	4.04	15.9
99.34	0.62	0.03	0.65
79.3	20.53	0.17	16.39
63.82	36.18	0	23.09
7.94	82.72	9.33	13.26
19.29	70.14	10.57	19.71
50.34	29.35	20.32	24.18
88.03	9.44	2.53	10.32
87.98	2.04	9.98	9.16
99.98	0.02	0	0.02
50	50	0	25
99.91	0.09	0	0.09
12.73	87.27	0	11.11
15.7	64.62	19.68	20.87
73.28	25.92	0.8	19.47
71.24	26.09	2.68	20.17
79.31	10.37	10.32	15.24
39.67	57.61	2.72	24.23
29.3	62.99	7.71	22.6
70.9	9.72	19.38	18.41
99.84	0.16	0	0.16
56.28	14.12	29.6	22.26
50.12	41.45	8.43	24.8
79.7	12.38	7.93	14.9
