# Supplementary material for: Paracrine signalling between intestinal epithelial and tumour cells induces a regenerative programme
Source: eLife. 2022 May 11;11:e76541. doi: 10.7554/eLife.76541 (PMC9094746; doi:10.7554/eLife.76541)
Supplement: Figure 5—source data 3. [file elife-76541-fig5-data3.xlsx]

## Sheet: Fig5E
pThbs1 per mm²	pCTGF per mm²
529.204	4.39735
6329.03	698.505
7.59205	116.974
4817.59	1203.01
15609.9	2000.5
12261.3	1186.49
